# Supplementary material for: Triplet state structure–property relationships in a series of platinum acetylides: effect of chromophore length and end cap electronic properties
Source: Royal Society of Chemistry journal article supplement (doi:10.1039/c9cp02892g), 2019-01-01
Supplement: c9cp02892g1.pdf [file c9cp02892g1.pdf]

## **Triplet state structure-property relationships in a series of platinum acetylides: effect of chromophore length and electronic properties**

Thomas M. Cooper,<sup>\*†</sup> Joy E. Haley,<sup>†</sup> Jennifer L. Fore,<sup>†</sup> David J. Stewart,<sup>‡</sup> Douglas M. Krein,<sup>‡</sup> Aaron R. Burke,<sup>‡</sup> Jonathan E. Slagle,<sup>§</sup>

<sup>†</sup>Materials and Manufacturing Directorate, Air Force Research Laboratory, Wright-Patterson Air Force Base, Dayton, Ohio 45433, United States

<sup>‡</sup>General Dynamics Information Technology, Dayton, Ohio 45431, United States

<sup>§</sup>Slagle Photonics, Dayton, Ohio 45433, United States

### **Electronic Supporting Information**

#### **Contents**

|                                          |    |
|------------------------------------------|----|
| Linear spectroscopy data .....           | 2  |
| Computational Chemistry Figures.....     | 13 |
| Triplet state absorption spectra .....   | 14 |
| Computational chemistry data tables..... | 20 |

## Linear spectroscopy data

Ground state absorption spectra of these compounds dissolved methyl-THF, emission and excitation spectra collected from methyl-THF glass at 77 K were collected by Abigail Shelton from Kirk Schanze's group, Department of Chemistry, University of Florida, Gainesville FL. Emission spectra(10 nm ex/em bandwidth) were obtained by exciting the sample at the ground state spectrum absorption maximum while excitation spectra(10 nm ex/em bandwidth) were obtained by monitoring emission intensity at the emission maximum. The spectra have been converted to transition dipole moment representation and corrected for inner filter effects. (Angulo, Grampp, & Rosspeintner, 2006)

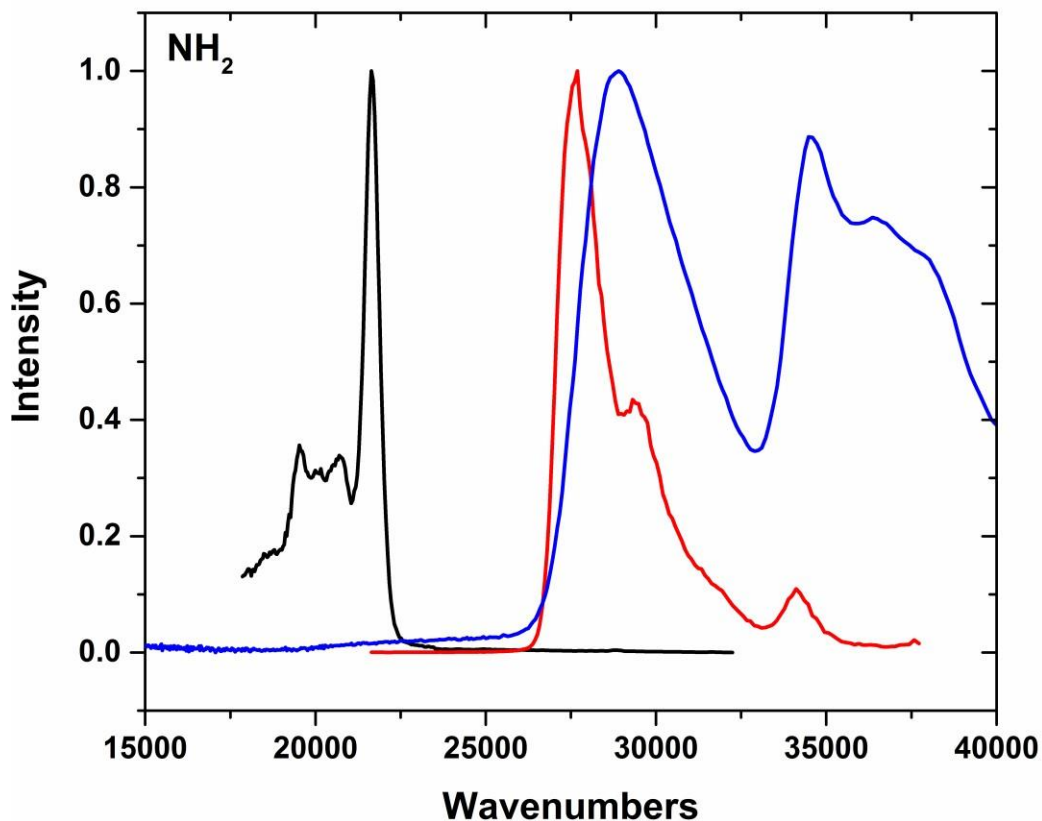

Fig S1 Emission(black line), excitation(red line) and absorption(blue line) spectra for NH<sub>2</sub>.

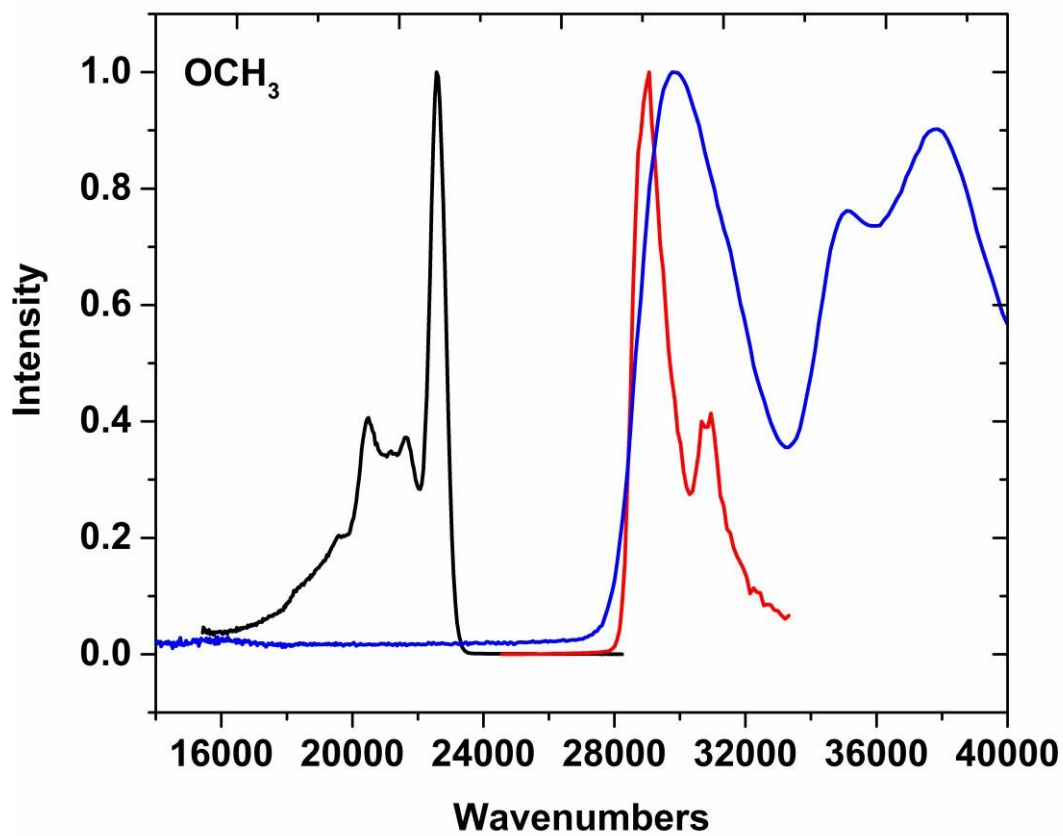

FigS2 Emission(blackline), excitation(red line) and absorption(blue line) spectra for  $\text{OCH}_3$ .

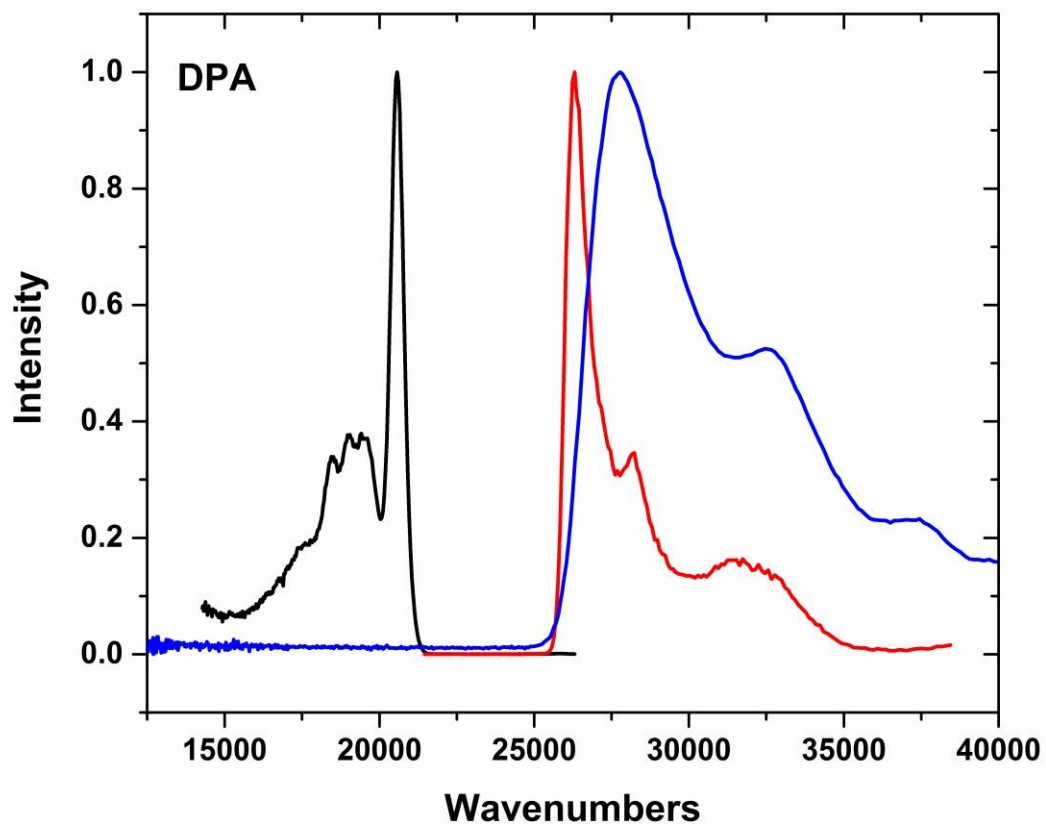

Fig S3 Emission(black line), excitation(red line) and absorption(blue line) spectra for DPA.

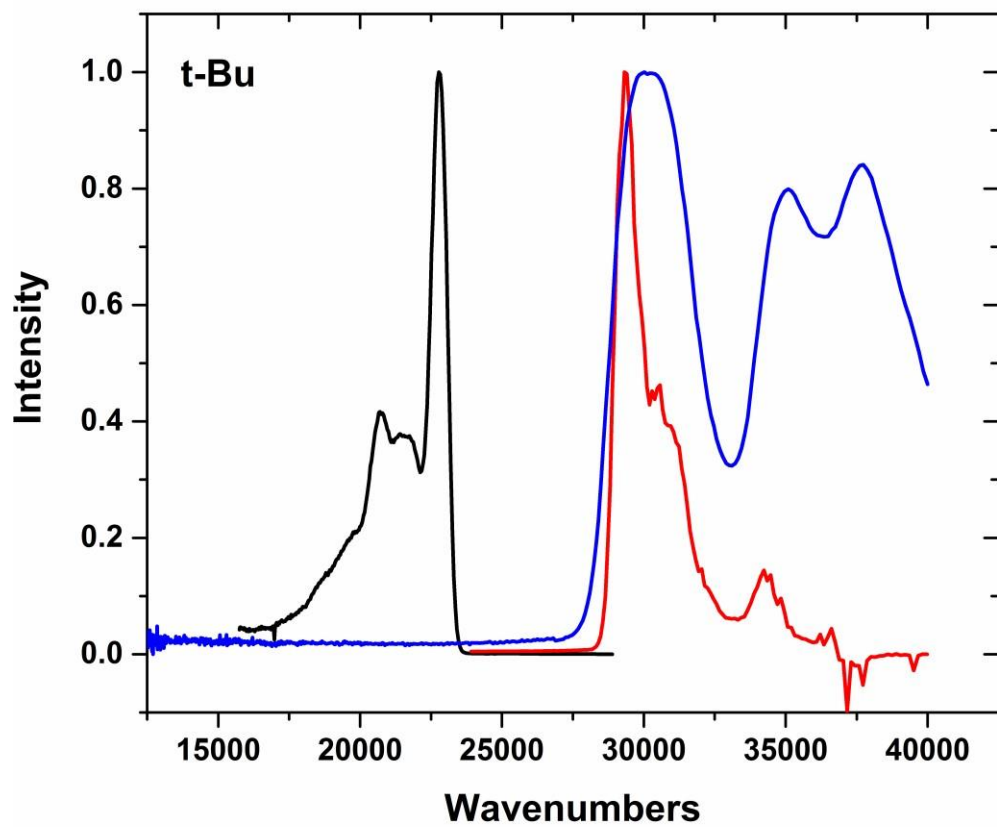

FigS4 Emission(black line), excitation(red line) and absorption(blue line) spectra for t-Bu.

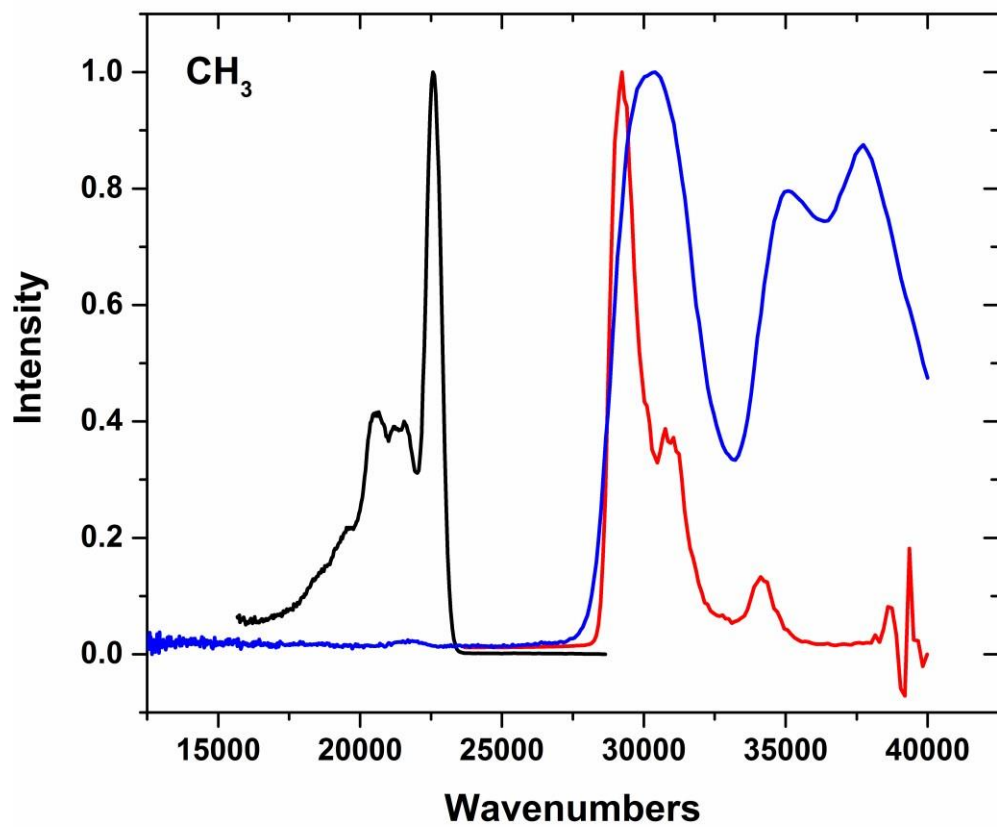

Fig S5 Emission(black line), excitation(red line) and absorption(blue line) spectra for CH<sub>3</sub>.

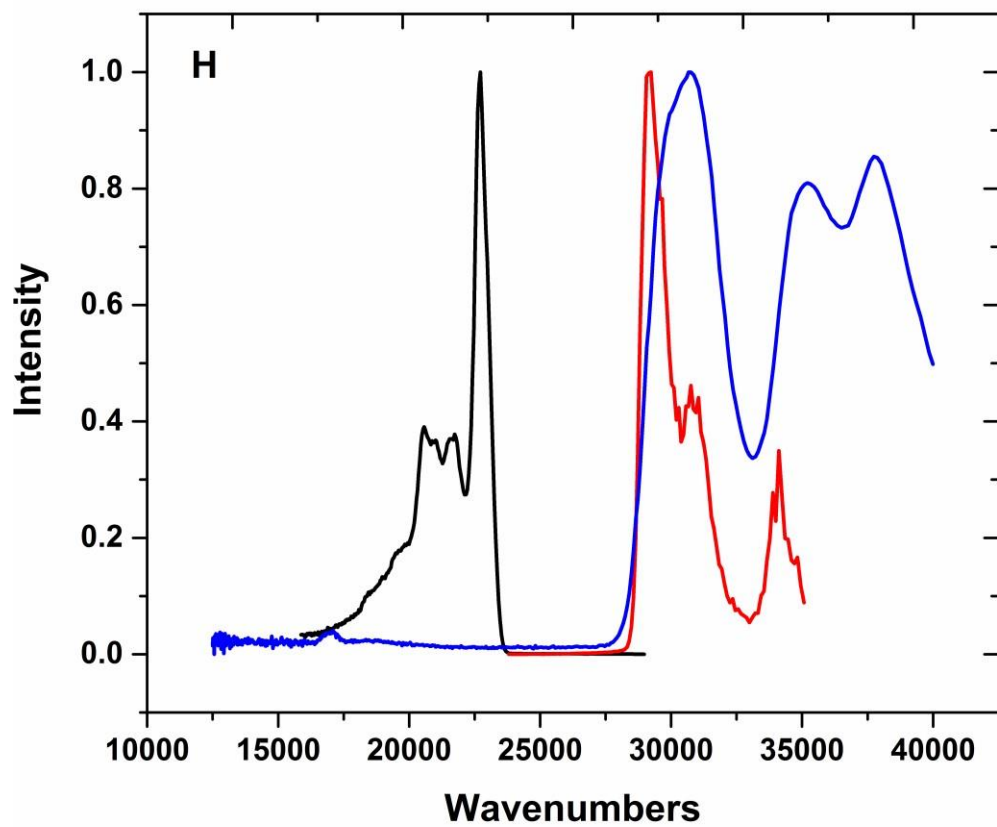

Fig S6 Emission(black line), excitation(red line) and absorption(blue line) spectra for H.

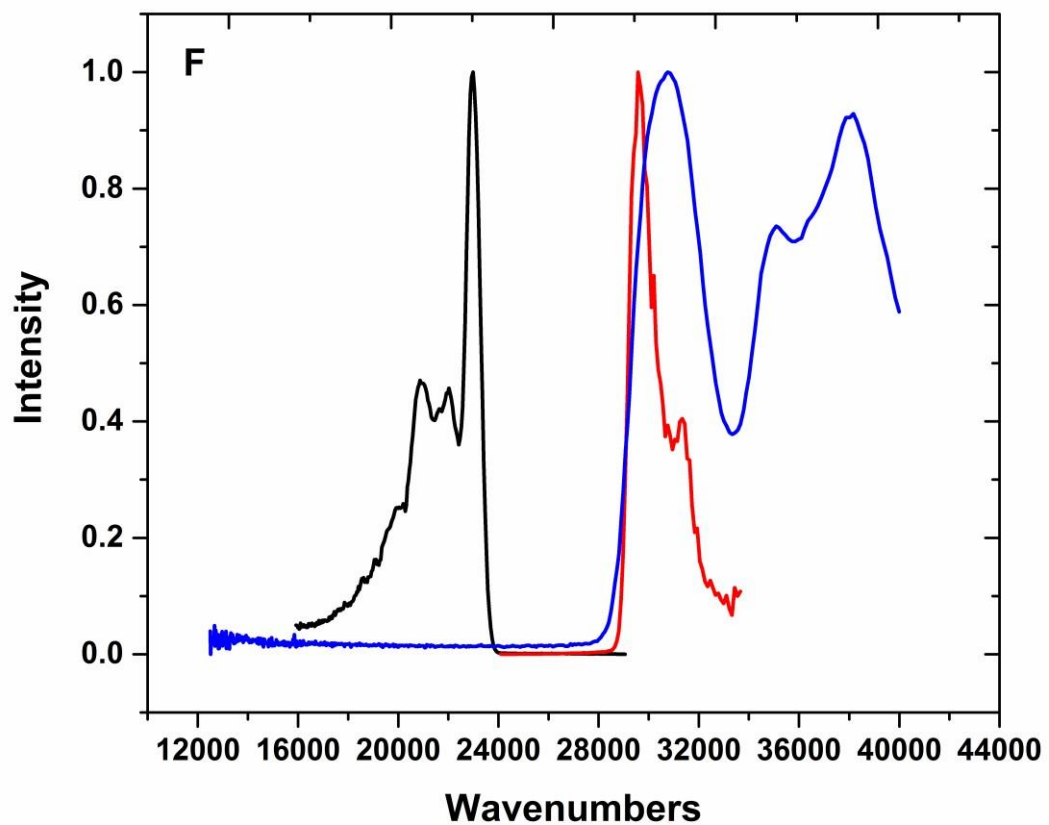

Fig S7 Emission(black line), excitation(red line) and absorption(blue line) spectra for F.



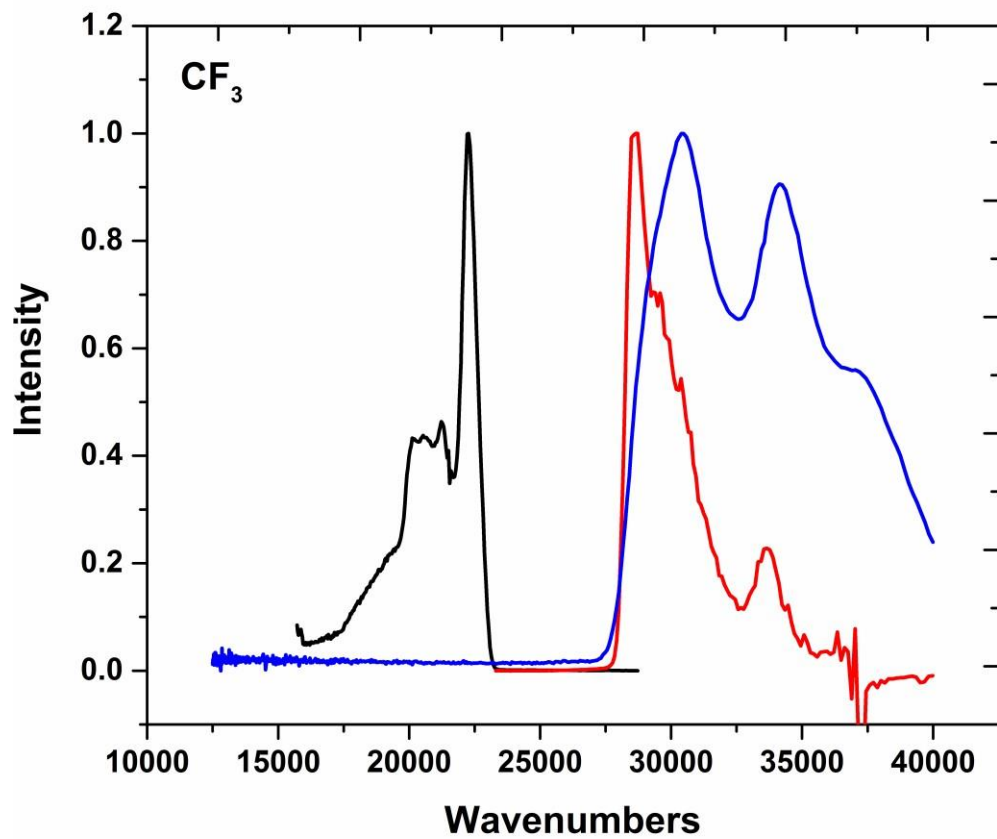

Fig S8 Emission(black line), excitation(red line) and absorption(blue line) spectra for  $\text{CF}_3$ .

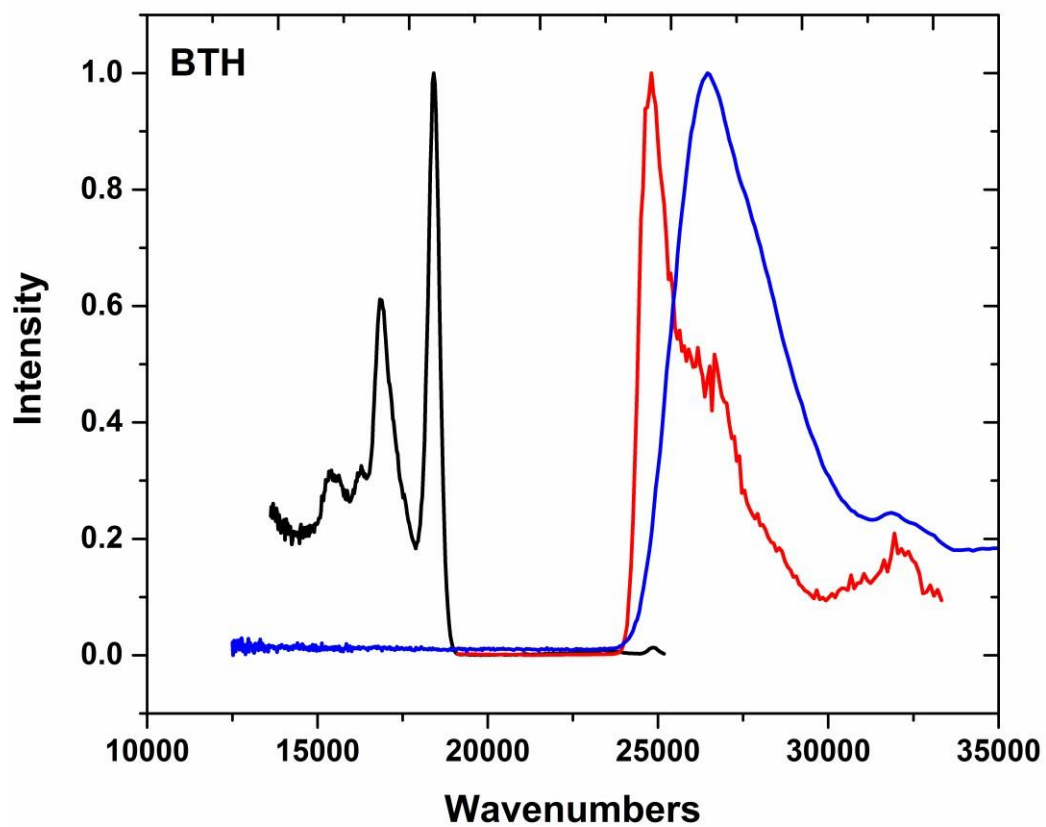

Fig S9 Emission(black line), excitation(red line) and absorption(blue line) spectra for BTH.

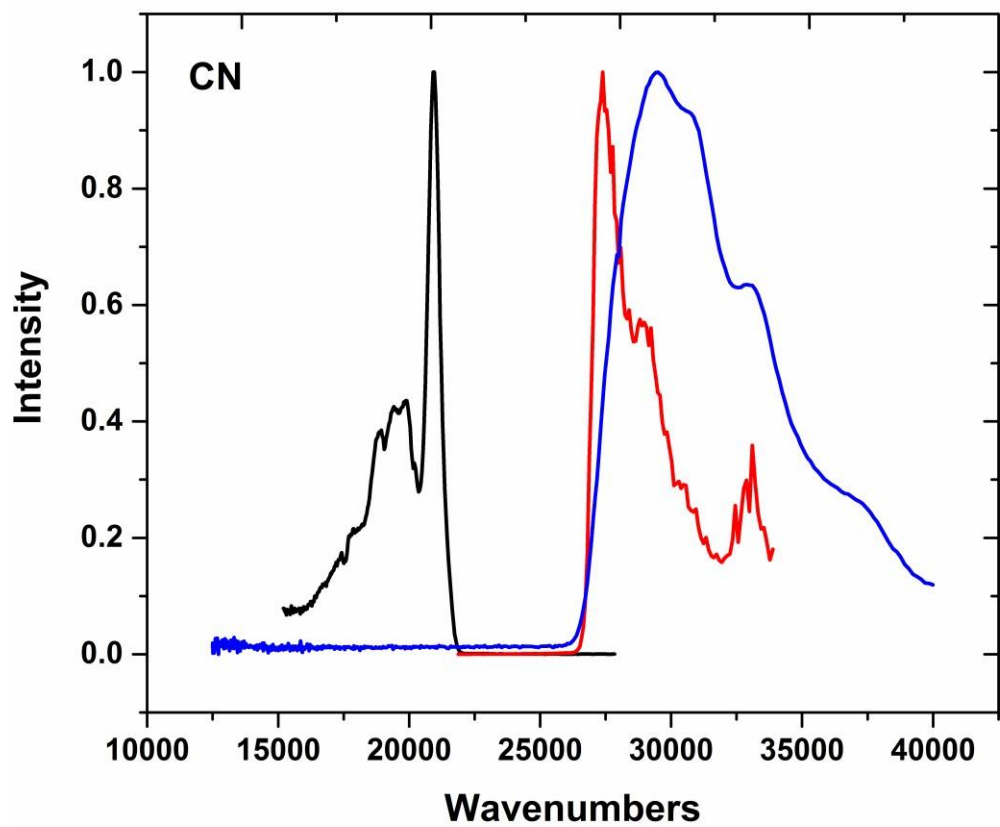

Fig S10 Emission(black line), excitation(red line) and absorption(blue line) spectra for CN.

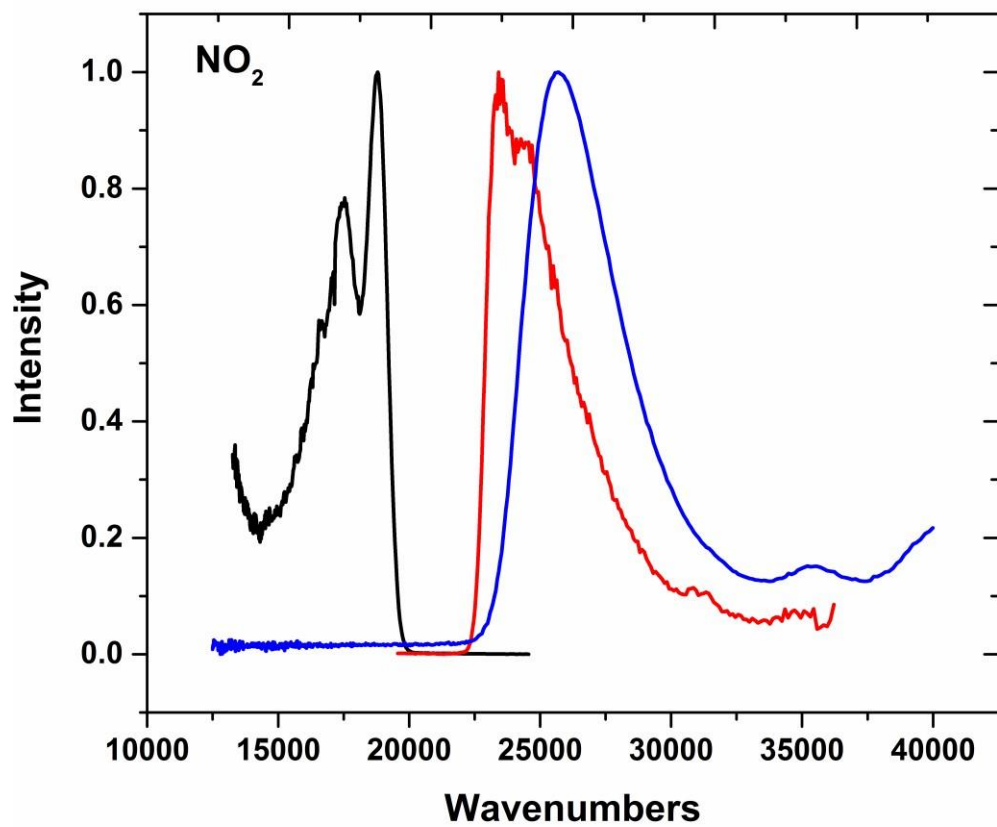

FigS11 Emission(black line), excitation(red line) and absorption(blue line) spectra for NO<sub>2</sub>.

## Computational Chemistry Figures

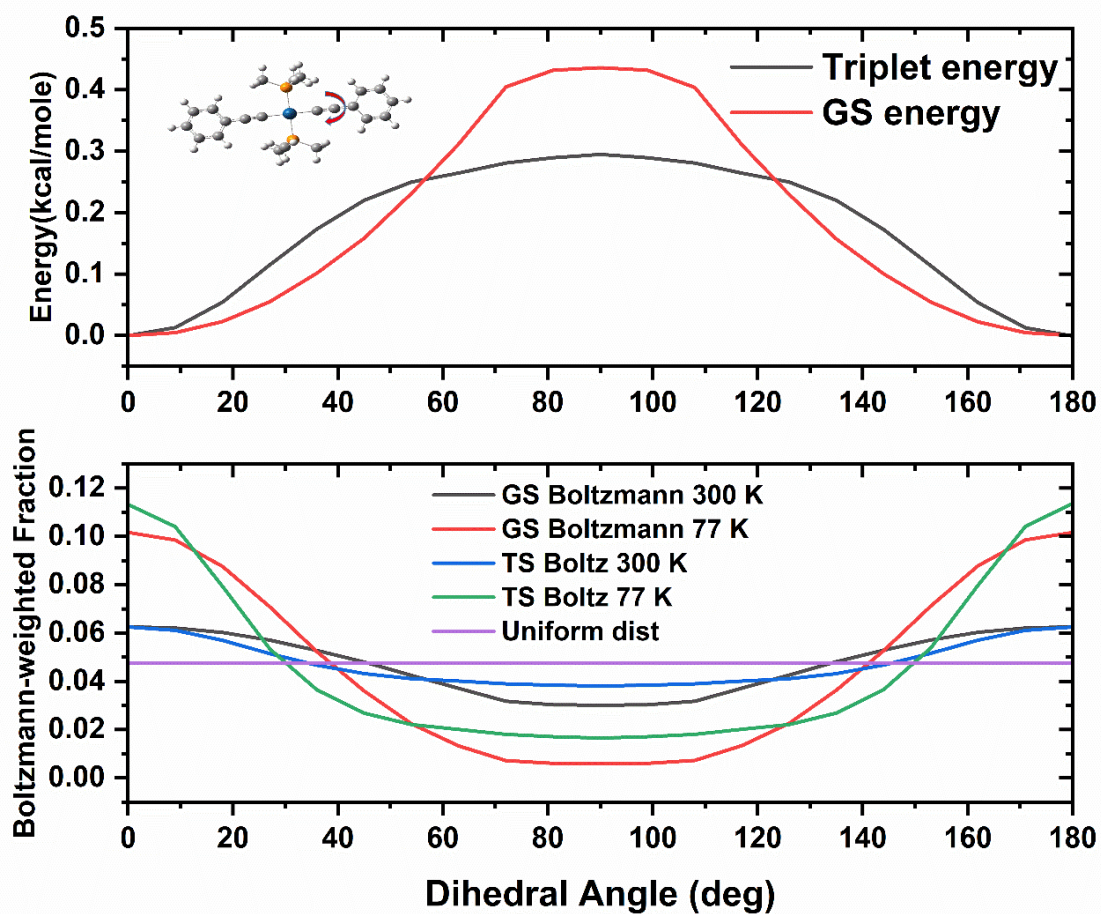

**FigS12** Upper panel: PES scan of the H ground and triplet state; Lower panel: Boltzmann-weighted dihedral angle distribution for chromophore H.

## Triplet state absorption spectra

The samples were dissolved in benzene and deoxygenated by three successive freeze-pump-thaw cycles. Nanosecond transient absorption measurements were carried out using the third harmonic (355 nm) of a Q-switched Nd:YAG laser (Quantel Brilliant, pulse width of  $\sim 5$  ns). Pulse fluences of up to  $1 \text{ mJ cm}^{-2}$  at the excitation wavelength were typically used. A detailed description of the laser flash photolysis apparatus was published earlier. (Rogers, Cooper, Fleitz, Glass, & McLean, 2002)

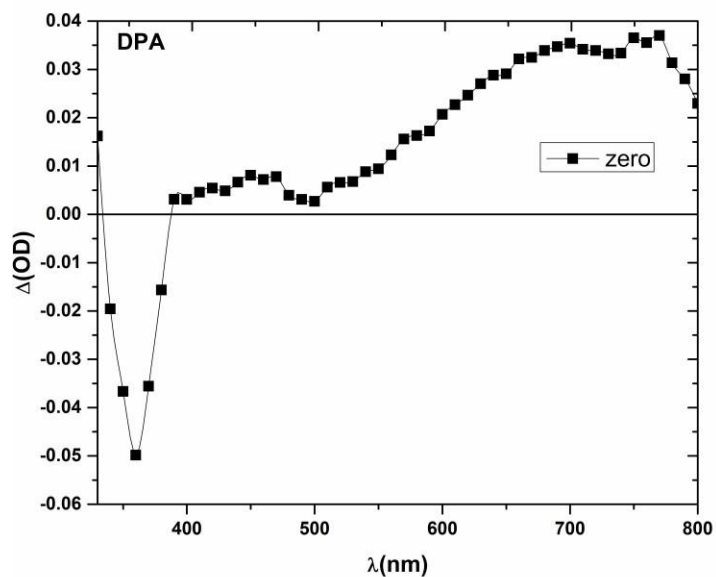

Fig S13 Triplet state absorption spectrum of DPA.

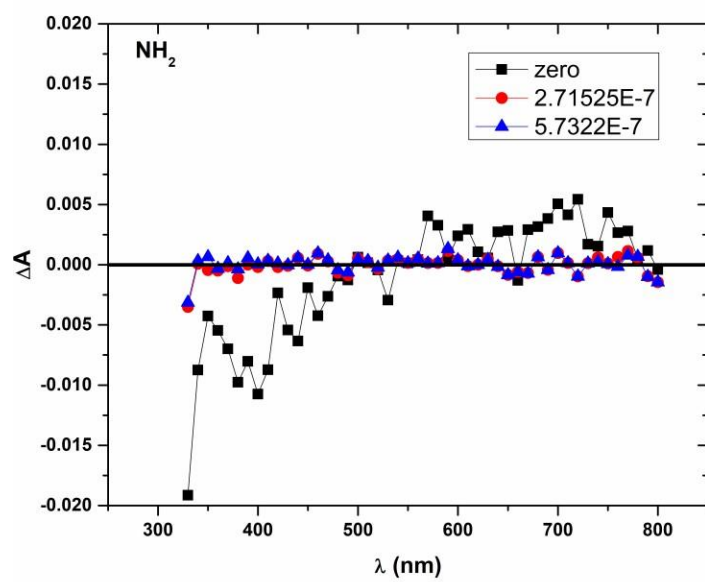

Fig S14 Triplet state absorption spectrum of  $\text{NH}_2$ .

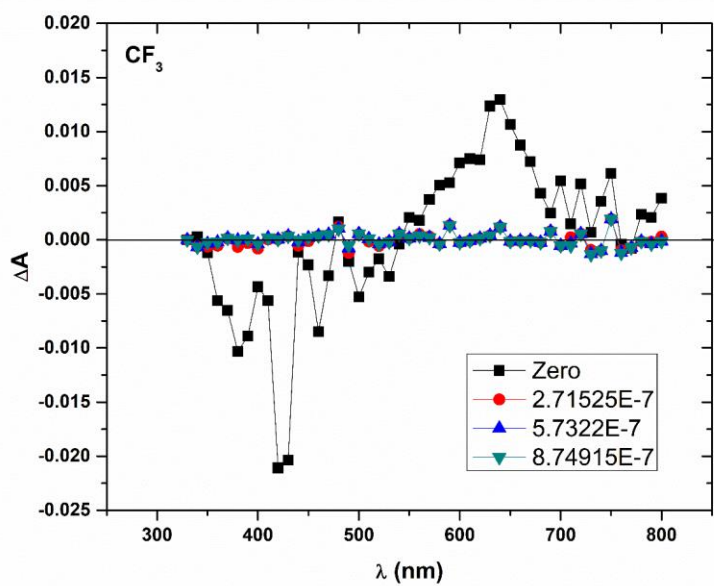

Fig S15 Triplet state absorption spectrum of  $\text{CF}_3$ .



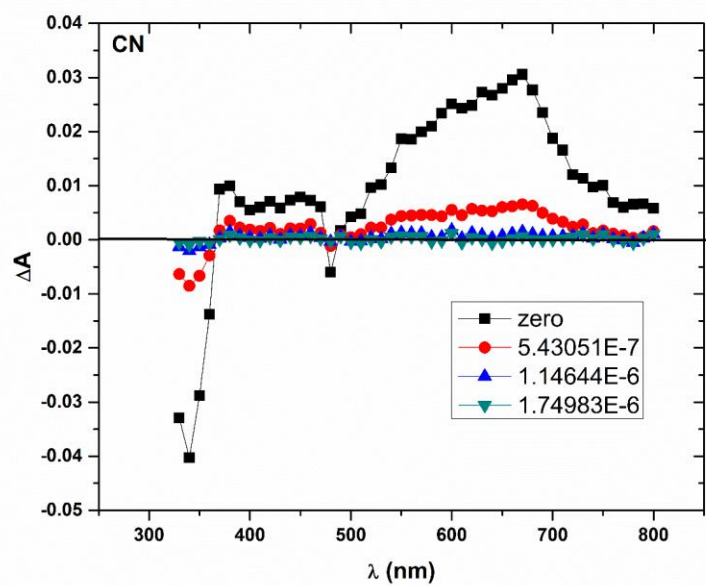

Fig S16 Triplet state absorption spectrum of CN.

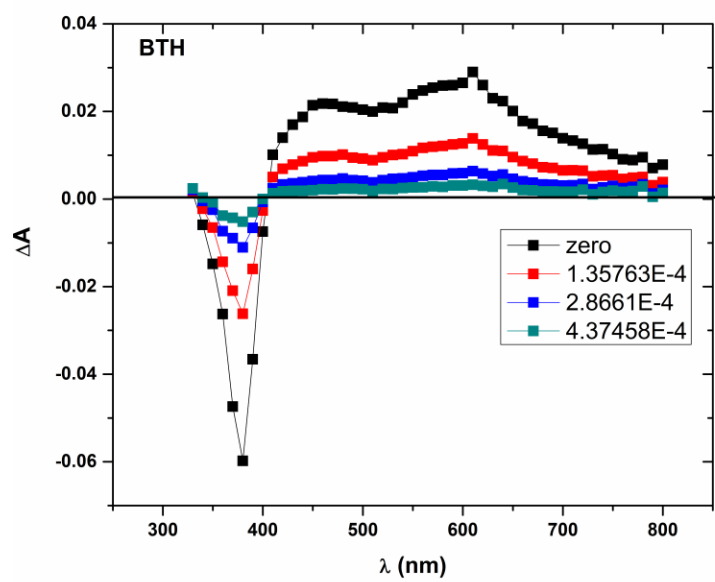

Fig S17 Triplet state absorption spectrum of BTH.

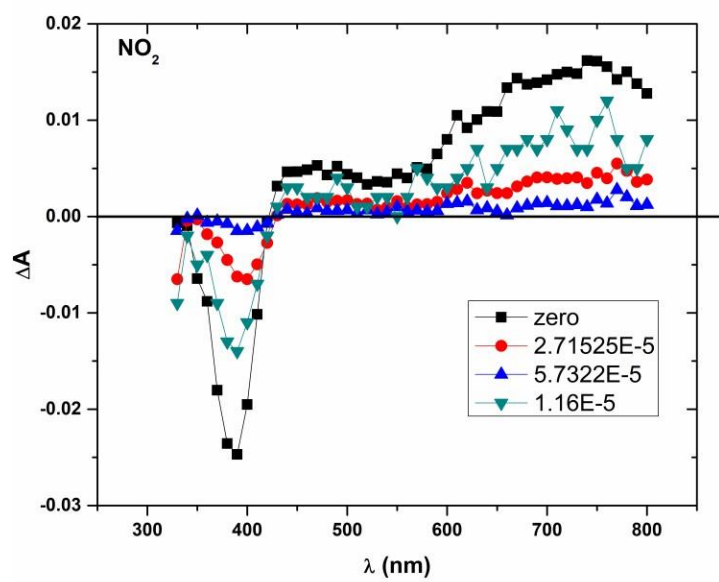

Fig S18 Triplet state absorption spectrum of NO<sub>2</sub>.

## Computational chemistry data tables

Calculations were done using Gaussian 09W, Version 7.0. (Frisch, G.W., Schlegel, & G. E. Scuseria) The chromophores were modeled as trans-Pt(PMe<sub>3</sub>)<sub>2</sub>(C≡C-Phenyl-X)<sub>2</sub> in THF through use of PCM. We performed DFT energy minimizations for the ground state using B3LYP/6-311g(2d,p) and TDDFT calculations using CAM-B3LYP/6-311g(2d,p). The basis set for the central Pt atom was SDD.

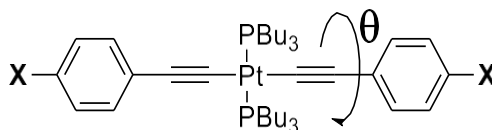

For all calculations the angle  $\theta$  between the phenyl rings was 90 deg.

**Table S1** Calculated ground( $S_0$ ) and triplet state( $T_1$ ) energies.

| Ligand                 | $E(S_0)^a$  | $E(S_0) (T_1)^b$ | $\Delta E^c$ | $E(T_1)^d$  | $E_H^e$  | $E_L$    | $EA^f$  |
|------------------------|-------------|------------------|--------------|-------------|----------|----------|---------|
| <b>NH<sub>2</sub></b>  | -1768.39606 | -1768.38113      | 0.406        | -1768.29393 | -5.02898 | -0.82288 | 0.52572 |
| <b>OCH<sub>3</sub></b> | -1886.75848 | -1886.74509      | 0.364        | -1886.65584 | -5.24776 | -0.90479 | 0.69933 |
| <b>DPA</b>             | -2692.81217 | -2692.80075      | 0.311        | -2692.71997 | -5.02898 | -1.13472 | 1.0656  |
| <b>t-Bu</b>            | -1972.24079 | -1972.22657      | 0.387        | -1972.13716 | -5.39770 | -1.01581 | 0.93825 |
| <b>CH<sub>3</sub></b>  | -1736.29960 | -1736.28546      | 0.385        | -1736.19653 | -5.41021 | -1.00683 | 0.94396 |
| <b>H</b>               | -1657.64252 | -1657.62853      | 0.381        | -1657.53809 | -5.50681 | -1.06833 | 1.0555  |
| <b>F</b>               | -1856.17748 | -1856.16331      | 0.386        | -1856.07291 | -5.51661 | -1.06234 | 1.0672  |
| <b>BTH</b>             | -3100.89742 | -3100.88432      | 0.357        | -3100.81590 | -5.55770 | -1.99461 | 2.1165  |
| <b>CF<sub>3</sub></b>  | -2331.94370 | -2331.93050      | 0.359        | -2331.84314 | -5.73865 | -1.45283 | 1.6972  |
| <b>CN</b>              | -1842.18888 | -1842.17698      | 0.324        | -1842.09610 | -5.83362 | -1.84876 | 2.1693  |
| <b>NO<sub>2</sub></b>  | -2066.78035 | -2066.77052      | 0.267        | -2066.70045 | -5.93240 | -2.67572 | 2.8232  |

<sup>a</sup>Energy(relaxed  $S_0$  geometry, perpendicular conformation)(au).

<sup>b</sup>Energy(ground state, relaxed  $T_1$  geometry)(au).

<sup>c</sup> $E(S_0, \text{ relaxed } T_1 \text{ geometry}) - E(\text{ relaxed } S_0 \text{ geometry, perpendicular conformation})(\text{eV})$ .

<sup>d</sup> $E(\text{ relaxed } T_1 \text{ geometry})(\text{au})$ .

<sup>e</sup>HOMO, LUMO energies, relaxed  $S_0$  geometry, perpendicular conformation(eV).

<sup>f</sup>Ligand electron affinity(-  $E(\text{LUMO})(\text{eV})$ ).

**Table S2** Summary of TDDFT Calculations for  $\theta = 90$  deg.

| <b>X</b>               | $\Delta E^a$ | $\Delta E_1^b$ | $\Delta E_2$ | $\Delta E_3$ | $\Delta E_4$ | $\Delta E_5$ |
|------------------------|--------------|----------------|--------------|--------------|--------------|--------------|
| <b>NH<sub>2</sub></b>  | 3.99         | 2.84           | 2.94         | 3.71         | 3.74         | 3.92         |
| <b>OCH<sub>3</sub></b> | 4.07         | 2.90           | 3.01         | 3.90         | 3.91         | 3.97         |
| <b>DPA<sup>c</sup></b> | 3.76         | 2.67           | 2.75         | 3.14         | 3.14         | 3.47         |
| <b>t-Bu</b>            | 4.09         | 2.90           | 3.00         | 3.96         | 4.22         | 4.29         |
| <b>CH<sub>3</sub></b>  | 4.10         | 2.89           | 2.99         | 3.97         | 4.22         | 4.24         |
| <b>H</b>               | 4.12         | 2.92           | 3.03         | 3.99         | 4.22         | 4.33         |
| <b>F</b>               | 4.14         | 2.92           | 3.04         | 3.99         | 4.09         | 4.11         |
| <b>BTH</b>             | 3.53         | 2.34           | 2.39         | 3.21         | 3.27         | 3.83         |
| <b>CF<sub>3</sub></b>  | 4.06         | 2.81           | 2.91         | 4.01         | 4.11         | 4.30         |
| <b>CN</b>              | 3.88         | 2.60           | 2.68         | 3.96         | 3.98         | 4.28         |
| <b>NO<sub>2</sub></b>  | 3.53         | 2.46           | 2.53         | 2.74         | 2.75         | 3.39         |

<sup>a</sup>Transition energy in for the  $S_0 \rightarrow S_1$  transition(eV) for state 1.

<sup>b</sup>Transition energy for the  $S_0 \rightarrow T_1$  transition(eV), and  $S_0 \rightarrow T_2, T_3, T_4$  and  $T_5$  states in columns 4-7.

<sup>c</sup>Additional  $S_0 \rightarrow T_n$  transitions(eV) for DPA. State 6: 3.59; State 7: 3.69; State 8: 3.70,

<sup>d</sup>Additional  $S_0 \rightarrow T_n$  transitions(eV) for NO<sub>2</sub>. State 6: 3.39; State 7: 3.80.

**Table S3** Selected bond lengths from equilibrium ground state geometry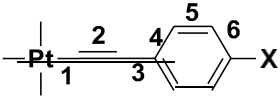

| Ligand                 | 1 <sup>a</sup> | 2      | 3      | 4      | 5      | 6      |
|------------------------|----------------|--------|--------|--------|--------|--------|
| <b>NH<sub>2</sub></b>  | 2.0077         | 1.2459 | 1.4330 | 1.4229 | 1.4000 | 1.4189 |
| <b>OCH<sub>3</sub></b> | 2.0070         | 1.2454 | 1.4330 | 1.4193 | 1.4055 | 1.4105 |
| <b>DPA</b>             | 2.0144         | 1.2432 | 1.4361 | 1.4213 | 1.4014 | 1.4143 |
| <b>t-Bu</b>            | 2.0062         | 1.2454 | 1.4332 | 1.4230 | 1.3999 | 1.4182 |
| <b>CH<sub>3</sub></b>  | 2.0062         | 1.2453 | 1.4335 | 1.4214 | 1.4039 | 1.4129 |
| <b>H</b>               | 2.0050         | 1.2454 | 1.4332 | 1.4236 | 1.4037 | 1.4102 |
| <b>F</b>               | 2.0043         | 1.2451 | 1.4326 | 1.4240 | 1.4033 | 1.3994 |
| <b>BTH</b>             | 2.0074         | 1.2439 | 1.4314 | 1.4226 | 1.3989 | 1.4160 |
| <b>CF<sub>3</sub></b>  | 2.0023         | 1.2450 | 1.4299 | 1.4240 | 1.3990 | 1.4105 |
| <b>CN</b>              | 2.0037         | 1.2447 | 1.4298 | 1.4244 | 1.3982 | 1.4175 |
| <b>NO<sub>2</sub></b>  | 1.9997         | 1.2447 | 1.4287 | 1.4252 | 1.3974 | 1.4090 |

<sup>a</sup>Ground state bond length 1(Å). The other bonds are labeled 2-6.

**Table S4** Selected bond lengths from equilibrium T<sub>1</sub> state geometry.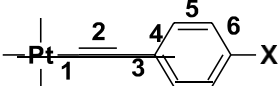

| Ligand                 | 1 <sup>a</sup> | 2      | 3      | 4      | 5      | 6      |
|------------------------|----------------|--------|--------|--------|--------|--------|
| <b>NH<sub>2</sub></b>  | 1.9817         | 1.2799 | 1.3725 | 1.4816 | 1.3758 | 1.4431 |
| <b>OCH<sub>3</sub></b> | 1.9795         | 1.2820 | 1.3708 | 1.4772 | 1.3712 | 1.4466 |
| <b>DPA</b>             | 1.9932         | 1.2712 | 1.3806 | 1.4775 | 1.3705 | 1.4566 |
| <b>t-Bu</b>            | 1.9778         | 1.2837 | 1.3703 | 1.4811 | 1.3807 | 1.4401 |
| <b>CH<sub>3</sub></b>  | 1.9778         | 1.2835 | 1.3704 | 1.4777 | 1.3749 | 1.4506 |
| <b>H</b>               | 1.9754         | 1.2852 | 1.3701 | 1.4805 | 1.3796 | 1.4387 |
| <b>F</b>               | 1.9750         | 1.2847 | 1.3696 | 1.4836 | 1.3790 | 1.4271 |
| <b>BTH</b>             | 1.9934         | 1.2607 | 1.3962 | 1.4576 | 1.3708 | 1.4667 |
| <b>CF<sub>3</sub></b>  | 1.9740         | 1.2817 | 1.3736 | 1.4750 | 1.3746 | 1.4439 |
| <b>CN</b>              | 1.9800         | 1.2757 | 1.3770 | 1.4747 | 1.3703 | 1.4592 |
| <b>NO<sub>2</sub></b>  | 1.9757         | 1.2695 | 1.3867 | 1.4605 | 1.3755 | 1.4433 |

<sup>a</sup>Triplet state bond length 1(Å). The other bonds are labeled 2-6.

**Table S5** Electron central platinum atom population change upon excitation to the S<sub>1</sub> state.

| <b>Ligand</b> | <b>d<sup>1</sup></b> | <b>π<sup>*2</sup></b> | <b>Δρ<sup>3</sup></b> |
|---------------|----------------------|-----------------------|-----------------------|
| <b>NH2</b>    | 0.11                 | 0.50                  | 0.39                  |
| <b>OCH3</b>   | 0.15                 | 0.47                  | 0.32                  |
| <b>DPA</b>    | 0.06                 | 0.36                  | 0.30                  |
| <b>t-Bu</b>   | 0.17                 | 0.43                  | 0.26                  |
| <b>CH3</b>    | 0.17                 | 0.43                  | 0.26                  |
| <b>H</b>      | 0.19                 | 0.42                  | 0.23                  |
| <b>F</b>      | 0.18                 | 0.43                  | 0.25                  |
| <b>BTH</b>    | 0.14                 | 0.06                  | -0.08                 |
| <b>CF3</b>    | 0.21                 | 0.24                  | 0.03                  |
| <b>CN</b>     | 0.19                 | 0.15                  | -0.04                 |
| <b>NO2</b>    | 0.21                 | 0.05                  | -0.16                 |

<sup>1</sup>Ground state electron density of d orbital on Pt atom.

<sup>2</sup>S<sub>1</sub> state electron density of π\* orbital on Pt atom.

<sup>3</sup>Calculated from population analysis of S<sub>1</sub> state when platinum complex is in an out-of-plane conformation. Change in population is defined as population(π\* orbital, platinum atom) – population(d orbital, platinum atom).



**Table S6** Summary of spin density data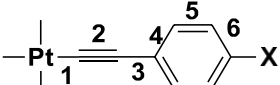

| <b>Ligand</b>          | <b>Pt<sup>1</sup></b> | <b>CC<sup>2</sup></b> | <b>Phenyl<sup>3</sup></b> | <b>End Cap(X)<sup>4</sup></b> | <b>Remainder<sup>5</sup></b> |
|------------------------|-----------------------|-----------------------|---------------------------|-------------------------------|------------------------------|
| <b>NH<sub>2</sub></b>  | 0.24079               | 0.47223               | 0.95941                   | 0.19662                       | 0.13095                      |
| <b>OCH<sub>3</sub></b> | 0.21824               | 0.53472               | 1.0377                    | 0.10705                       | 0.10230                      |
| <b>DPA</b>             | 0.14693               | 0.39034               | 1.0701                    | 0.33764                       | 0.055008                     |
| <b>t-Bu</b>            | 0.20722               | 0.56586               | 1.1312                    | 0.0028490                     | 0.092854                     |
| <b>CH<sub>3</sub></b>  | 0.20448               | 0.56052               | 1.1330                    | 0.011192                      | 0.090758                     |
| <b>H</b>               | 0.21530               | 0.59700               | 1.1275                    | -0.036182                     | 0.096352                     |
| <b>F</b>               | 0.21529               | 0.58816               | 1.0630                    | 0.039800                      | 0.093796                     |
| <b>BTH</b>             | 0.10496               | 0.31934               | 0.90661                   | 0.63572                       | 0.033368                     |
| <b>CF<sub>3</sub></b>  | 0.19391               | 0.58325               | 1.1109                    | 0.032180                      | 0.079750                     |
| <b>CN</b>              | 0.16647               | 0.51310               | 1.0977                    | 0.15673                       | 0.065982                     |
| <b>NO<sub>2</sub></b>  | 0.18419               | 0.44802               | 0.80913                   | 0.48414                       | 0.074516                     |

<sup>1</sup>Spin density on central platinum atom

<sup>2</sup>Spin density on acetylene bond

<sup>3</sup>Spin density on phenyl ring

<sup>4</sup>Spin density on end cap

<sup>5</sup>Remainder spin density on the rest of the molecule(Remainder = 2-(SD(Pt)+SD(CC)+SD(Phenyl)+SD(X))

**Table S7** HOMO, LUMO and T<sub>1</sub> state Spin Density images

| Ligand           | HOMO                                                                                | LUMO                                                                                 | Spin Density                                                                          |
|------------------|-------------------------------------------------------------------------------------|--------------------------------------------------------------------------------------|---------------------------------------------------------------------------------------|
| NH <sub>2</sub>  | 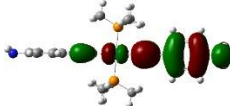   |     |    |
| OCH <sub>3</sub> |    |     |    |
| DPA              |    |    |    |
| t-Bu             |   |    |   |
| CH <sub>3</sub>  |  |  |  |
| H                |  |  |  |
| F                |  |   |  |

|                 |                                                                                    |                                                                                     |                                                                                      |
|-----------------|------------------------------------------------------------------------------------|-------------------------------------------------------------------------------------|--------------------------------------------------------------------------------------|
| BTH             | 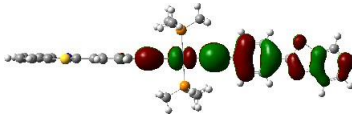  |   |   |
| CF <sub>3</sub> |   |   |   |
| CN              |   |   |   |
| NO <sub>2</sub> |  |  |  |

## References

Angulo, G., Grampp, G., & Rosspeintner, A. (2006). Recalling the appropriate representation of electronic spectra. *Spectrochimica Acta Part A*, 65, 727-731.

Frisch, M., G.W., T., Schlegel, H., & G. E. Scuseria, G. e. (n.d.). Gaussian 09, Revision E.01. Gaussian, Inc., Wallingford CT, 2013.

Haley, J. E., Krein, D. M., Monahan, J. L., Burke, A. R., McLean, D. G., Slagle, J. E., . . . Cooper, T. M. (2011). Photophysical properties of a series of electron-donating and -withdrawing platinum acetylide two-photon chromophores. *Journal of Physical Chemistry A*, 113, 265-273.

Rogers, J. E., Cooper, T. M., Fleitz, P. A., Glass, D. J., & McLean, D. G. (2002). Photophysical Characterization of a Series of Platinum(II)-Containing Phenyl-Ethynyl Oligomers. *Journal of Physical Chemistry A*, 106, 10108-10115.
